# 1 Rapid whole brain imaging of neural activities in freely 2 behaving larval zebrafish

3

4 Lin Cong<sup>1,4</sup>, Zeguan Wang<sup>2,4</sup>, Yuming Chai<sup>2,4</sup>, Wei Hang<sup>1,4</sup>, Chunfeng Shang<sup>1</sup>, Wenbin  
5 Yang<sup>2</sup>, Lu Bai<sup>1</sup>, Jiulin Du<sup>1</sup>, Kai Wang<sup>1,3</sup>, Quan Wen<sup>2</sup>

6

7 1. Institute of Neuroscience, State Key Laboratory of Neuroscience, CAS Center for  
8 Excellence in Brain Science and Intelligence Technology, Chinese Academy of  
9 Sciences, Shanghai 200031, China.

10

11 2. Chinese Academy of Sciences Key Laboratory of Brain Function and Disease, School  
12 of Life Sciences, Center for Excellence in Brain Science and Intelligence Technology,  
13 University of Science and Technology of China, Hefei, 230027, China.

14

15 3. University of Chinese Academy of Sciences, Beijing 100049, China.

16

17 4. These authors contributed equally to this work.

18

19 Correspondence should be addressed to K.W. ([wangkai@ion.ac.cn](mailto:wangkai@ion.ac.cn)) or Q.W.  
20 ([qwen@ustc.edu.cn](mailto:qwen@ustc.edu.cn)).

21

22

1 **Abstract:**

2 The internal brain dynamics that links sensation and action is arguably better studied  
3 during animal's natural behaviors. Here we report novel volume imaging and 3D tracking  
4 techniques that perform whole brain imaging of neural activities in freely swimming  
5 larval zebrafish. We demonstrated the capability of our system through functional  
6 imaging of neural activities during visually evoked behavior and prey capture behavior in  
7 larval zebrafish.

8

1 **Main text:**

2 **Introduction:**

3 A central goal in systems neuroscience is to understand how distributed neural circuitry  
4 dynamics drives animal behaviors. The emerging field of optical neurophysiology allows  
5 monitoring [1, 2] and manipulating [3-5] the activities of defined populations of neurons  
6 that express genetically encoded activity indicators [6, 7] and light-activated proteins [1,  
7 4, 5, 8]. Larval zebrafish has become an attractive model system to investigate the neural  
8 correlates of behaviors owing to its small brain size, optical transparency and rich  
9 behavioral repertoire [9, 10]. In particular, whole brain imaging of larval zebrafish using  
10 light sheet/two-photon microscope holds the promise of creating a comprehensive  
11 functional map that links neuronal activities and behaviors [11-13].

12

13 Recording neural activity map in larval zebrafish has been successfully integrated with  
14 the virtual reality paradigm: closed-loop fictive behaviors in immobilized fish can be  
15 monitored and controlled via visual feedback that varies according to the electrical output  
16 patterns of motor neurons [11, 14]. The behavioral repertoire, however, may be further  
17 expanded in freely swimming zebrafish whose behavioral states can be directly inferred  
18 and when sensory feedback loops are mostly intact and active. For example, it is likely  
19 that vestibular as well as proprioceptive feedbacks are perturbed in immobilized zebrafish  
20 [14, 15]. The crowning moment during the hunting behavior [16-18] — when a fish  
21 succeeds in catching a paramecium — could not be easily replicated in a virtual reality  
22 setting. Therefore, whole brain imaging in a freely swimming zebrafish may allow optical  
23 interrogation of brain circuits underlying a range of less explored behaviors.

1

2 Although whole brain functional imaging methods are available for head-fixed larval  
3 zebrafish, imaging a speeding brain imposes many more technical challenges. Current  
4 studies on freely swimming zebrafish were either limited to non-imaging optical system  
5 [19] or wide field imaging at low resolution [20]. While the Light Sheet Microscope  
6 (LSM) has demonstrated entire brain coverage and single neuron resolution in restrained  
7 zebrafish [12], it lacks the speed to follow rapid fish movement. Moreover, in LSM, the  
8 sample is illuminated from its side, a configuration that is difficult to be integrated with a  
9 tracking system. The conventional Light Field Microscope (LFM) [21, 22] is a promising  
10 alternative because of its higher imaging speed, but its spatial resolution is relatively low.  
11 A specialized LFM for monitoring neural activities using compressed sensing was  
12 developed recently [23], but it relies on spatiotemporal sparsity of fluorescent signals and  
13 cannot be applied to moving animals.

14

15 Here, we describe a fast 3D tracking technique and a novel volume imaging method that  
16 allow whole brain calcium imaging with high spatial and temporal resolution in freely  
17 behaving larval zebrafish. Zebrafish larva possesses extraordinary mobility. It can move  
18 at an instantaneous velocity up to 50 mm/s [24] and acceleration of 1g. To continuously  
19 track fish motion, we have developed a high-speed closed-loop system in which (1)  
20 customized machine vision software allows rapid estimate of fish movement both in X-Y  
21 directions and Z direction; (2) feedback control signals drive a high-speed motorized X-Y  
22 stage (at 300 Hz) and piezo Z stage (at 100 Hz) to retain the entire fish head within the  
23 field of view of a high NA (25x, NA=1.05) objective.

1

2 A larval zebrafish sometimes makes blistering and unpredictable movement that can  
3 easily cause motion blur and severely degrade the imaging quality. To overcome this  
4 obstacle, we developed a new type of Light Field Microscope: eXtended field of view  
5 LFM (XLFM). XLFM can simultaneously image the whole brain neural activities (over a  
6 volume of  $800\ \mu\text{m} \times 800\ \mu\text{m} \times 200\ \mu\text{m}$ ) at  $\sim 3.4\ \mu\text{m} \times 3.4\ \mu\text{m} \times 5\ \mu\text{m}$  spatial resolution  
7 and at 77 Hz volume rate, with the aid of genetically encoded calcium indicator  
8 GCamp6f. Furthermore, the implementation of flashed fluorescence excitation (200  $\mu\text{s}$  in  
9 duration) allows blur-free fluorescent images to be captured when a zebrafish moves at a  
10 speed up to 10 mm/s. The seamless integration of the tracking and the imaging system  
11 makes it possible to reveal rich whole brain neural dynamics during natural behavior with  
12 unprecedented resolution. We demonstrated the ability of our system during visually  
13 evoked behavior and prey capture in larval zebrafish.

14

## 15 **Results:**

16 The newly developed XLFM is based on the general principle of light field [25] and can  
17 acquire 3D information from a single camera frame. The major advancement made by  
18 XLFM is the greatly relaxed constraints imposed by counteraction between spatial  
19 resolution and imaging volume coverage requirements in conventional LFM. This  
20 achievement relies on a few new techniques both in optics and in computational  
21 reconstruction method. First, a customized lenslet array (Figure 1a, Supplementary  
22 Figure 1) was placed at the rear pupil plane of the imaging objective, instead of being  
23 placed at the imaging plane as in LFM. Therefore, spatially invariant point spread

1 function (PSF) of the entire optical imaging system can be defined and measured  
2 (Supplementary Figure 2). Second, the aperture size of each micro-lens was decoupled  
3 from their interspacing and the spatial arrangement, so both the imaging volume and  
4 resolution can be optimized simultaneously given the limited imaging sensor size. Third,  
5 multifocal imaging [26, 27] was introduced to further increase the depth of view by  
6 dividing micro-lens array into several groups whose focal planes were at different axial  
7 positions (Figure 1b & c, Supplementary Figure 3 & 4). Forth, a new computational  
8 algorithm based on optical wave theory was developed to accurately reconstruct the  
9 entire 3D volume (see Methods).

10

11 We characterized the XLFM by imaging 0.5  $\mu\text{m}$  diameter fluorescent beads. The  
12 resolution can be preserved around  $3.4 \mu\text{m} \times 3.4 \mu\text{m} \times 5 \mu\text{m}$  within the imaging volume  
13 of  $800 \mu\text{m} \times 800 \mu\text{m} \times 200 \mu\text{m}$  (Supplementary Figure 5) when Signal-to-Noise Ratio  
14 (SNR) was high and dropped gradually outside this volume (Supplementary Figures 5-6,  
15 Methods). For *in vivo* experiments where complex optical properties of biological tissue  
16 come into play [28], the achievable resolution could be degraded. We demonstrated the  
17 capabilities of XLFM by imaging the whole brain neuronal activities of a larval zebrafish  
18 (5 d.p.f) at a speed of 77 volumes/s and at relatively low excitation laser exposure of 2.5  
19  $\text{mW}/\text{mm}^2$  (Figure 1d, Supplementary Video 1). The zebrafish, which expressed pan-  
20 neuronal GCamp6f, was imaged continuously for more than 300,000 volumes without  
21 severe photo bleaching (Supplementary Figure 7, Supplementary Video 2 & 3). To test  
22 whether XLFM could monitor fast changes in neuronal dynamics across whole brain at  
23 high resolution close to single neuron level, we first presented the larval zebrafish,

1 restrained in low melting point agarose, with visual stimulation (~ 2.6 sec duration). We  
2 found that different groups of neurons in the forebrain, midbrain and hindbrain were  
3 activated at different times (Figure 1e-f, Supplementary Video 1 & 4), suggesting rapid  
4 sensorimotor transformation across different brain regions.  
5

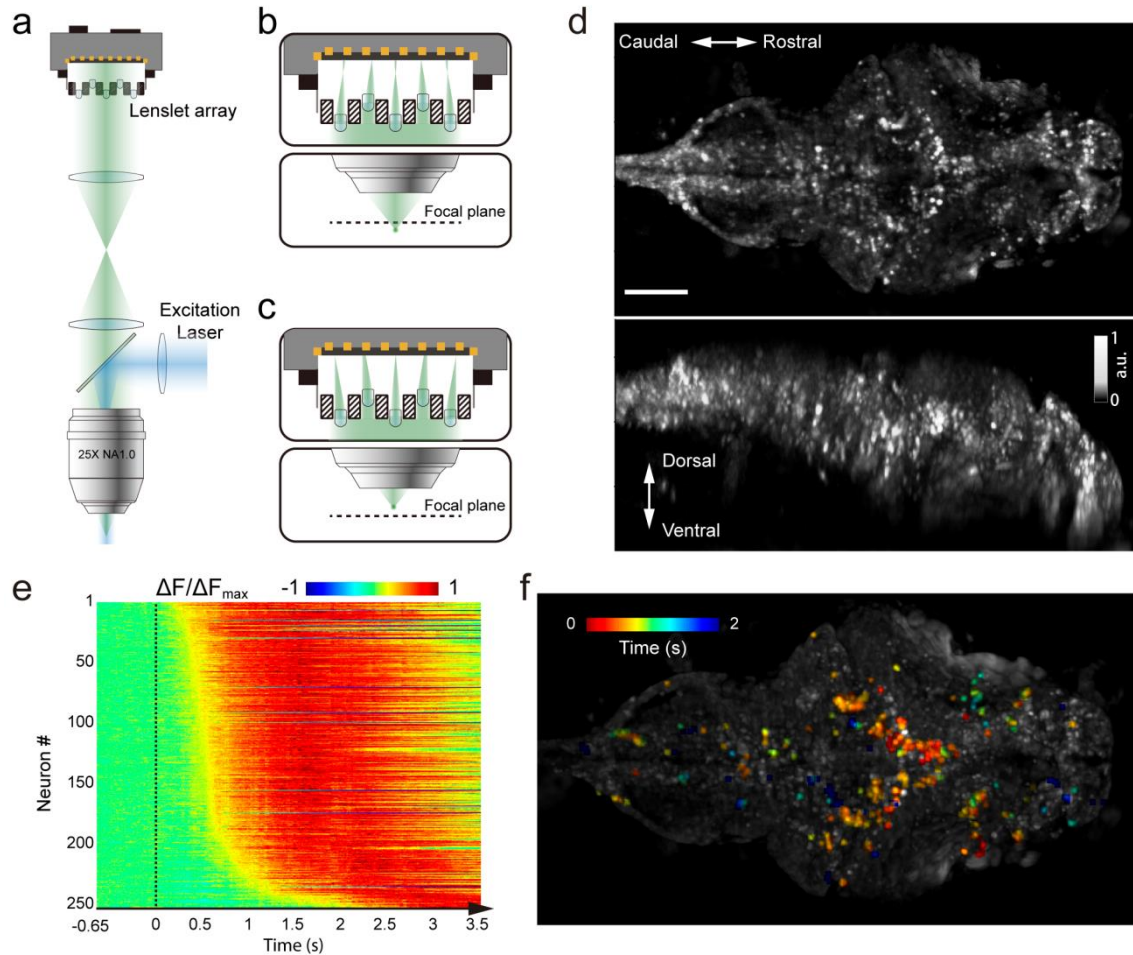

1  
2  
3  
4  
5  
6  
7  
8  
9  
10  
11  
12

Figure 1. Whole brain imaging of larval zebrafish with XLFM. (a) Schematic design of XLFM. The position of lenslet array is conjugate to the rear pupil plane of the imaging objective. Excitation laser (blue) provides uniform illumination across the sample. (b-c) Point sources at two different depths will form, through two different groups of microlenses, sharp images on the imaging sensor, and the positional information can be reconstructed from these distinct patterns. (d) Maximum Intensity Projections (MIPs) of pan-neuronal nucleus-localized GCaMP6f fluorescence images from a restrained larval zebrafish. (e) Normalized neuronal activities of selected neurons that exhibited increasing calcium responses after onset of light stimulation at  $t=0$ . Neurons were ordered by the onset time when the measured fluorescence signals reached 20% of their maximum. (f) The selected neurons in (e) were also color coded based on their response onset time. Scale bar is 100  $\mu\text{m}$ .



1 To track freely swimming larval zebrafish, we transferred fish into a water-filled chamber  
2 with glass ceiling and floor. The chamber, 20 mm × 20 mm × 0.8 mm in size, was  
3 coupled with a piezo actuator and mounted on a high-speed 2D motorized stage (Figure  
4 2). A tracking camera monitored the lateral movement of the fish, and an autofocus  
5 camera, which captured light field images of the fish, monitored the axial movement of  
6 the fish head (Figure 2, Supplementary Figure 8).

7

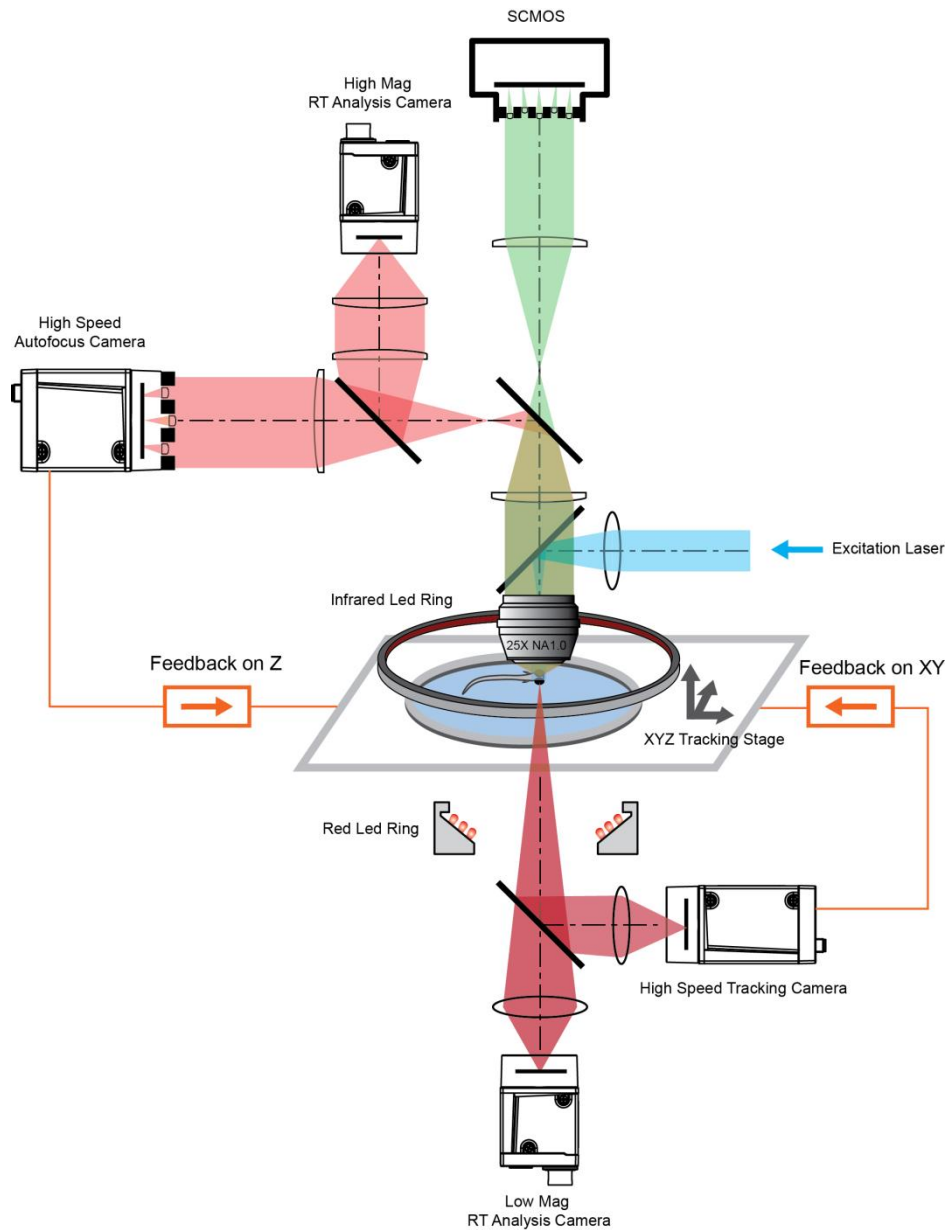

1

2 Figure 2. System schematics that integrates tracking, whole brain functional imaging, and real time  
3 behavioral analysis. Larval zebrafish was swimming in a customized chamber with optically  
4 transparent ceiling and floor. The water-filled chamber was mounted on a high-speed 3-axis stage (PI  
5 M686 & PI P725KHDS). Customized LED rings generated dark field illumination of the zebrafish.  
6 The scattered light was collected by four cameras: two cameras below the chamber were used for X-Y  
7 plane tracking and low magnification RT analysis respectively; two cameras above the chamber and  
8 after the imaging objective were used for Z autofocus and high magnification RT analysis. The

1 positional information of the larval zebrafish, acquired from the tracking and autofocus system, was  
2 converted to feedback voltage signals to drive the 3-axis stage and to compensate fish movement. The  
3 functional imaging system, described in Figure 1, shared the same imaging objective placed above the  
4 swimming chamber. The 3D tracking, RT behavioral analysis and functional imaging systems were  
5 synchronized for accurate correlation between neural activities and behavioral output.

6

7 Real-time machine vision algorithms allowed quick estimate of lateral (within 1 ms) and  
8 axial (~ 5 ms) head position (see Methods). The error signals in three dimensions, defined  
9 as the difference between the head position and the set point, were calculated (Figure 3a)  
10 and converted to analog voltage signals through Proportional–Integral–Derivative (PID)  
11 control to drive the motorized stage and the z piezo scanner. Tracking and autofocusing  
12 allowed rapid compensation of 3D fish movement (300 Hz in x and y, 100 Hz in z,  
13 Figure 3a) and retainment of the fish head within the field of view of the imaging  
14 objective.

15

16 Our tracking system permitted high-speed and high-resolution recording of larval  
17 zebrafish behaviors. With two cameras acquiring head and whole body videos  
18 simultaneously (Figure 2, Figure 3b), we recorded and analyzed in real time (see  
19 Methods) the kinematics of key features during the larval zebrafish prey capture (Figure  
20 3b & c, Supplementary Video 5 & 6). Consistent with several earlier findings [16-18],  
21 eye converged rapidly when the fish entered the prey capture state (Figure 3c). Other  
22 features that characterized tail and fin movement were also analyzed at high temporal  
23 resolution (Figure 3c).

24

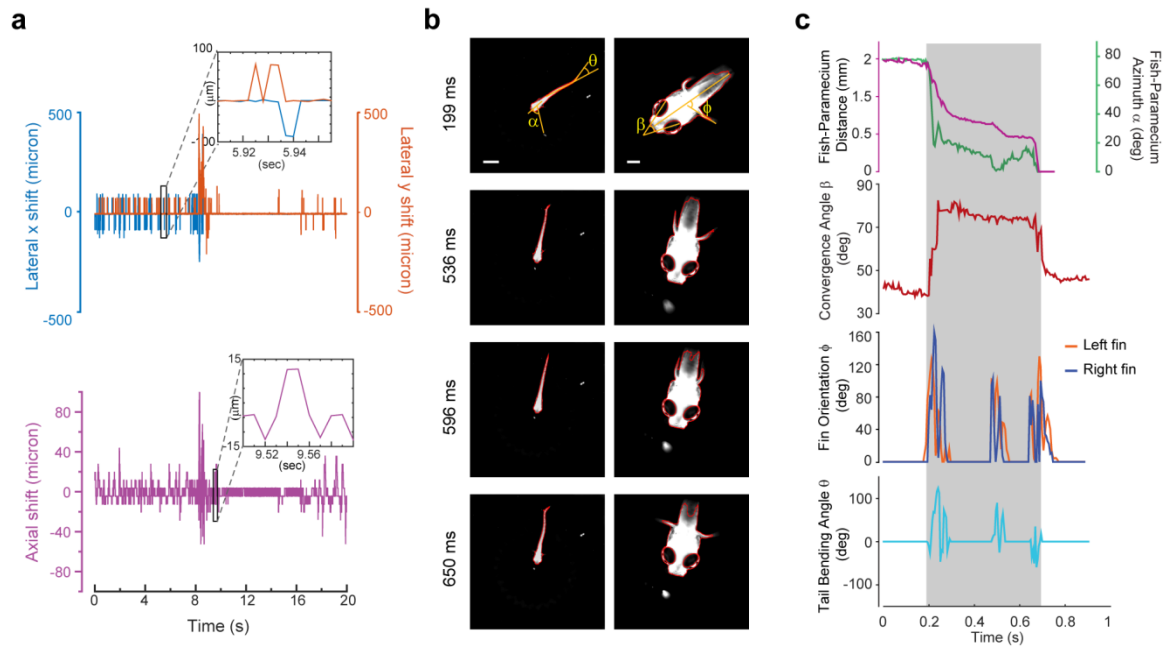

1

2 Figure 3. 3D Tracking of larval zebrafish. (a) Representative time varying error signals in three

3 dimensions, defined as the difference between the real head position and the set point. Inset provides

4 magnified view at short time interval. Lateral movement can be rapidly compensated within a few

5 milliseconds when the fish's instantaneous velocity is up to 10 mm/s. The axial shift was small

6 compared to the depth coverage (200  $\mu\text{m}$ ) during whole brain imaging, and thereby would have minor

7 effect on brain activity reconstruction. (b) Tracking images at 4 consecutive time points during prey

8 capture behavior, acquired at low (left) and high (right) magnification simultaneously. Scale bar is 1

9 mm (left) and 200  $\mu\text{m}$  (right). (c) Kinematics of behavioral features during prey capture. Shaded

10 region marks the beginning and the end of the prey capture process.

11

1 The integration of XLFM and 3D tracking system allowed us to perform whole brain  
2 functional imaging of a freely behaving larval zebrafish (Figure 2). We first replicated the  
3 light-evoked experiment (similar to Figure 1), albeit in a freely behaving zebrafish with  
4 pan-neuronal cytoplasm-labeled GCamp6s (Supplementary Video 7), which exhibited  
5 faster and more prominent calcium response. Strong activities were observed in the  
6 neuropil of optical tectum and the midbrain after stimulus onset. The fish tried to avoid  
7 strong light exposure and made fierce tail movement at ~ 60 Hz. Whole brain neural  
8 activities were monitored continuously during the light-evoked behavior except for  
9 occasional blurred frames due to the limited speed and acceleration of tracking stages.

10

11 Next, we, for the first time, captured whole brain neural activities during the entire prey  
12 capture process in freely swimming larval zebrafish (Supplementary Video 8). When a  
13 paramecium moved into the visual field of the fish, groups of neurons, as indicated as  
14 group 1 in Figure 4b, near the contralateral optical tectum of the fish were first activated  
15 ( $t_1$ ). The fish then converged its eyes onto the paramecium and changed its heading  
16 direction to approach the paramecium ( $t_2$ ). Starting from  $t_2$ , several groups of neurons in  
17 hypothalamus, midbrain and hindbrain, as highlighted as group 2, 3 and 4 in Figure 4b,  
18 were activated. It took the fish *three* attempts (Figure 4c) to catch and eat the paramecium.  
19 After the last try ( $t_4$ ), group 1 neurons' activities decreased gradually, while the activities  
20 in other groups of neurons continued to rise and persisted for ~ 1s before the calcium  
21 signals decreased. The earliest tectal activity (group 1) responsible for prey detection is  
22 consistent with previous studies [29, 30]. Moreover, owing to the technical advancement,  
23 our data revealed interesting neural dynamics arising from the other brain regions during

1 and after a successful prey capture. We also monitored similar behavior, in a zebrafish  
2 expressing nucleus-localized GCamp6f, with better resolution, but with less prominent  
3 calcium response (Supplementary Video 9).

4

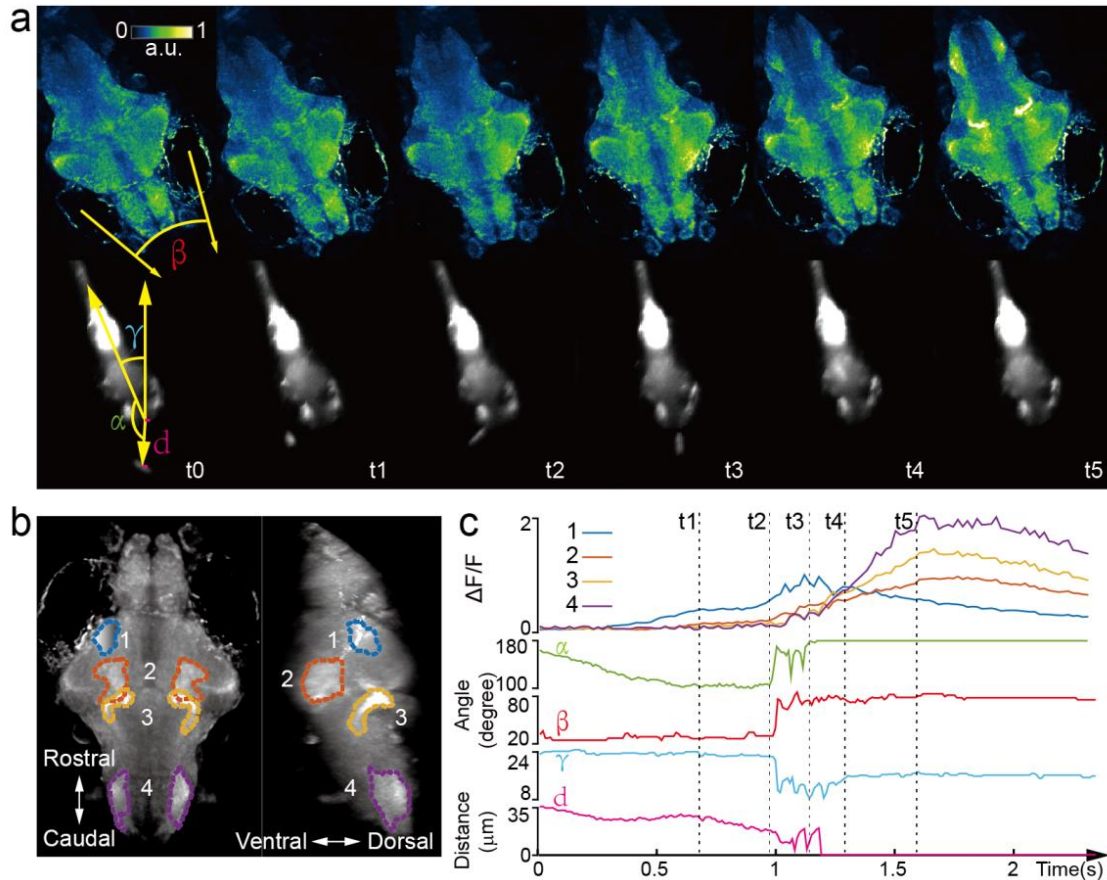

5

6 Figure 4. Whole brain imaging of larval zebrafish during prey capture behavior. (a) Renderings of  
7 whole brain calcium activity at six consecutive time points (up) and the corresponding behavioral  
8 images (bottom). Features used to quantify the behavior are: fish-paramaecium azimuth  $\alpha$ ; convergence  
9 angle between eyes  $\beta$ ; head orientation  $\gamma$ ; fish-paramaecium distance  $d$ . (b) MIPs of zebrafish brain  
10 with pan-neuronal cytoplasm-labeled GCaMP6f. Boundaries of four brain regions are color marked. (c)  
11 Neural dynamics inferred from GCaMP6 fluorescence changes in these four regions during the entire  
12 prey capture behavior (up) and the kinematics of behavioral features (bottom). Note that between t2

1 and t4, fish-paramecium distance  $d$  exhibits three abrupt kinks, representing fish's three attempts to  
2 catch the prey.

3

#### 4 **Discussion:**

5 Whole brain imaging in freely behaving animal has been previously reported in another  
6 model system, *C. elegans*, by integrating the spinning-disk confocal microscopy with a  
7 2D tracking system [31, 32]. In the more remote past, Howard Berg pioneered the use of  
8 3D tracking microscopy to study bacteria chemotaxis [33]. However, the significant  
9 increase of animal size imposes challenges both on tracking and imaging technologies. In  
10 particular, the XLFM, derived from the general concept of light field imaging [21, 25, 34,  
11 35], overcomes several critical limitations in the conventional LFM and allows  
12 optimization of imaging volume, resolution and speed simultaneously. Furthermore, it  
13 can be perfectly combined with flashed fluorescence excitation to capture blur-free  
14 images at high resolution during rapid fish movement. Taken together, we have  
15 developed a whole brain imaging and tracking microscopy suitable for freely behaving  
16 larval zebrafish, which has ~ 100,000 neurons and can move two orders of magnitude  
17 faster than *C. elegans*.

18

19 Tracking and whole brain imaging of naturally behaving zebrafish provides a new way to  
20 study sensorimotor transformation across the brain circuit. A large body of research  
21 suggests that sensory information processing depends strongly on the locomotor state of  
22 an animal [36-38]. The ability to sense self-motion, such as proprioceptive feedback [39]  
23 and efferent copy [40], can also profoundly shape the dynamics of the neural circuit and  
24 perception. It would be ideal to have physiological access to *all* neurons in defined

1 behavioral states, where *all* sensory feedback loops remain intact and functional. Our  
2 XLFM 3D tracking microscope is one step towards this goal, and our system would be  
3 better exploited to explore the neural basis of more sophisticated natural behaviors, such  
4 as prey capture and social interaction, where the integration of multiple sensory  
5 feedbacks becomes critical.

6

7 The capability of XLFM can be further improved with the aid of technology development  
8 in other areas. With more pixels on the imaging sensor, we can achieve even higher  
9 spatial resolution without sacrificing imaging volume coverage by introducing more than  
10 two different focal planes formed by more groups of microlenses. With better imaging  
11 objective that can provide higher numerical aperture and larger field of view at the same  
12 time, we can potentially image the entire nervous system of the larval zebrafish with  
13 single neuron resolution in all three dimensions. Additionally, the high imaging speed of  
14 XLFM holds the promise for recording electrical activity when high signal-to-noise  
15 fluorescent voltage sensors become available [41]. Finally, the illumination-independent  
16 characteristic of XLFM is perfectly suitable for recording brain activities from  
17 bioluminescent calcium/voltage indicators in a truly natural environment, where the light  
18 interference arising from fluorescence excitation can be eliminated [19].

19



## 1 **METHODS**

### 2 **XLFM**

3 The imaging system (Figure 1) was a customized upright microscope. Along the  
4 fluorescence excitation light path, a blue laser (Coherent, OBIS 488 nm, 100 mW) was  
5 expanded and collimated into a beam with a diameter of ~ 25 mm. It was then focused by  
6 an achromatic lens (focal length: 125 mm) and reflected by an dichroic mirror (Semrock,  
7 Di02-R488-25x36) into the back pupil of the imaging objective (Olympus,  
8 XLPLN25XWMP2, 25X, NA 1.05, WD 2mm) to result in an illumination area of ~1.44  
9 mm in diameter near the objective's focal plane. In fluorescence imaging light path, the  
10 excited fluorescence was collected by the imaging objective and transmits through the  
11 dichroic mirror. A pair of achromatic lenses (focal lengths: F1=180 mm & F2=160 mm),  
12 arranged in 2F1+2F2 manner, was placed after the objective and dichroic mirror to  
13 conjugate the objective's back pupil onto a customized lenslet array (Supplementary  
14 Figure 1). The customized lenslet array was an aluminum plate with 27 holes (1 mm  
15 diameter) housing 27 customized micro-lenses (focal length: 26 mm). 27 micro-lenses  
16 were divided into two groups (Supplementary Figure 1) and an axial displacement of 2.5  
17 mm was introduced between them. Due to the blockage of light by aluminum microlenses  
18 housing, 16% of the light after 1.05 NA imaging objective is effectively collected by  
19 camera. This efficiency is equivalent to using a 0.4 NA imaging objective. In the end, the  
20 imaging sensor of a sCMOS camera (Hamamatsu, Orca-Flash 4.0 v2) was placed at the  
21 middle plane between two focal planes formed by two different groups of micro-lenses.  
22 The total magnification of the imaging system was ~ 4, so one camera pixel (6.5  $\mu\text{m}$ )  
23 corresponded to ~1.6  $\mu\text{m}$  on the sample.

1

2 We developed a computational algorithm for 3D volume reconstruction. It requires an  
3 accurately measured PSF (Supplementary Figure 2). The spatially invariant PSF was  
4 measured by recording images of a 500 nm diameter fluorescent bead sitting on a  
5 motorized stage under the objective. A stack of 200 images was recorded when the bead  
6 was scanned with a step size of 2  $\mu\text{m}$  in axial direction from 200  $\mu\text{m}$  below the  
7 objective's focal plane to 200  $\mu\text{m}$  above. Since the images formed by two different  
8 groups of micro-lenses were from different axial locations and have different  
9 magnifications, the measured raw PSF data should be reorganized into two  
10 complementary parts: PSF\_A and PSF\_B (Supplementary Figure 3 & 4), according to the  
11 spatial arrangement of micro-lenses. We took PSF\_A stack, PSF\_B stack and a single  
12 frame of raw image (2048 x 2048 pixels) as inputs, and applied Richard-Lucy  
13 deconvolution to reconstruct the 3D volume.

14

## 15 **Image reconstruction of XLFM**

16 The underling framework of this new algorithm is developed from basic idea in Richard-  
17 Lucy deconvolution. It starts with an estimation of the 3D fluorescent object:

$$Obj(x, y, z)$$

18 The algorithm assumes that the real 3D object can be approximated by a discrete number  
19 of x-y planes at different axial z positions:

$$20 \quad Obj(x, y, z) \sim Obj(x, y, z_k), \text{ where } k = 1, 2 \dots n$$

21 The number and positions of these planes can be arbitrary, while, the Nyquist sampling  
22 rate is usually chosen to optimize the speed and accuracy of the reconstruction.

23

1 Since the imaging system consists of two different groups of micro-lens, as shown in  
 2 Supplementary Figure 1, their PSFs (Supplementary Figure 3 & 4) each consists of a  
 3 stack of planes that are measured at same chosen axial positions  $z_k$ :

$$4 \quad PSF_A(x, y, z_k) \ \& \ PSF_B(x, y, z_k)$$

5 Additionally, the images formed by two different groups of micro-lenses have different  
 6 magnifications, which can be determined experimentally. A ratio between two different  
 7 magnifications can be defined as:

$$\gamma = \frac{\text{Magnification of group A microlenses}}{\text{Magnification of group B microlenses}}$$

8 Then the captured image on the camera can be estimated as:

$$Img_{Est}(x, y) = \sum_{k=1}^n \{Obj_A(x, y, z_k) \otimes PSF_A(x, y, z_k) + Obj_B(x, y, z_k) \otimes PSF_B(x, y, z_k)\}$$

$$9 \quad \text{Where, } Obj_A(x, y, z_k) = Obj_B(\gamma x, \gamma y, z_k)$$

10 The operator  $\otimes$  represents 2D convolution.

11

12 The goal of the algorithm is to estimate the  $Obj(x, y, z_k)$  from the measured camera  
 13 frame:

$$Img_{Meas}(x, y)$$

14 According to the algorithm of Richard-Lucy deconvolution, the iterative reconstruction  
 15 can be expressed as:

$$Img_{Est}^i(x, y) = \sum_{k=1}^n \{Obj_A^{i-1}(x, y, z_k) \otimes PSF_A(x, y, z_k) + Obj_B^{i-1}(x, y, z_k) \otimes PSF_B(x, y, z_k)\}$$

$$Obj_A^{tmp}(x, y, z_k) = Obj_A^{i-1}(x, y, z_k) \left\{ \frac{Img_{Meas}(x, y)}{Img_{Est}^i(x, y)} \otimes PSF_A(-x, -y, z_k) \right\}$$

$$Obj_B^{tmp}(x, y, z_k) = Obj_B^{i-1}(x, y, z_k) \left\{ \frac{Img_{Meas}(x, y)}{Img_{Est}^i(x, y)} \otimes PSF_B(-x, -y, z_k) \right\}$$

$$Obj_A^i(x, y, z_k) = w(z_k) Obj_A^{tmp}(x, y, z_k) + (1 - w(z_k)) Obj_B^{tmp}(\gamma x, \gamma y, z_k)$$

$$Obj_B^i(x, y, z_k) = w(z_k) Obj_A^{tmp} \left( \frac{x}{\gamma}, \frac{y}{\gamma}, z_k \right) + (1 - w(z_k)) Obj_B^{tmp}(x, y, z_k)$$

1 Here  $0 \leq w(z_k) \leq 1$  is the weighting factor at different axial positions. The choice of  
 2  $w(z_k)$  can be arbitrary. Due to the fact that the resolutions achieved by different groups  
 3 of lens at different  $z$  positions are not the same, the weighting factor can take this effect  
 4 into consideration and weights higher quality information more than the lower one. We  
 5 empirically choose  $w(z_k)$  to optimize reconstruction quality and speed.

6

7 The starting estimation of the object can be any non-zeros value. Near the end of  
 8 iterations,  $Obj_A^i(x, y, z_k)$  and  $Obj_B^i(x, y, z_k)$  are interchangeable except with different  
 9 magnifications. Either of them can be used as the resulting estimate of the 3D object.

10

11 In XLFM, together with its reconstruction algorithm, the diffraction effect of the 3D light  
 12 field is properly taken into consideration by experimentally measured PSF. The captured  
 13 raw imaging data can be fed into the algorithm directly without any preprocessing. The  
 14 overlapping between sub-images formed by different micro-lenses is allowed  
 15 (Supplementary Figure 9) and the algorithm can automatically resolve the ambiguity  
 16 without affecting reconstructing performance. Due to this reason, the covered field of  
 17 view can be increased significantly. Based on the observation that additional changes of  
 18 estimated object became very small after 30 iterations, the reconstruction algorithm was  
 19 usually terminated after 30 iterations if there was no specific annotation. The

1 computation can speed up significantly by using GPU. It takes about 4 minutes to  
2 reconstruct one 3D volume using desktop computer with a GPU (Nvidia Titan X). In  
3 comparison, the reconstruction runs ~20X slower using CPU (Intel E5-2630v2) on a Dell  
4 desktop.

5

6 The 3D deconvolution methods based on wave optics theory has been developed for  
7 conventional LFM, but our methods differs from [21] in several ways: (1) the optical  
8 imaging system is different. (2) The definitions of PSFs are different. Ours defines a  
9 spatially *invariant* PSF, while [21] needs to define a spatially variant PSF, which could  
10 lead to complexity in deconvolution algorithm and increased amount of computation. (3)  
11 The PSF in [21] needs to be simulated based on a model of an ideal imaging system and  
12 the assumption of monochromatic light, while ours can be measured experimentally and  
13 takes all practical conditions, including imaging system and light properties, into  
14 consideration.

15

## 16 **Resolution characterization of XLFM**

17 Unlike conventional microscopy, where the performance of the imaging system can be  
18 fully characterized by PSF at the focal plane, the capability of XLFM is better described  
19 as a function of positions throughout its imaging volume. By employing a state-of-art  
20 objective, the imaging performance across the X-Y field of view is relatively uniform.  
21 Here, we mainly focus on characterizing axial resolutions at different axial positions in  
22 the whole imaging volume.

23

1 In our imaging system, each micro-lens is designed to have equivalent NA of 0.075, so  
2 the resolution in X-Y plane is estimated to be 3.4  $\mu\text{m}$ . The XLFM gains axial resolution  
3 by viewing the object from large projection angles achieved by micro-lens sitting near the  
4 edge of the objective's back pupil plane. For example, if two point light sources were  
5 located at the same position in X-Y plane but were separated by  $\Delta z$  in axial direction, one  
6 micro-lens in XLFM would capture an image of these two points with a shift between  
7 them. The shift can be determined as:

$$d = \Delta z * \tan\theta$$

8 Where  $\theta$  is the inclination angle that can be inferred from measured PSF (Supplementary  
9 Figure 2). If the two points in the image can be resolved, it means these two points  
10 separated by  $\Delta z$  can be resolved by the imaging system. Since micro-lens sitting in the  
11 outer layer of the array offers the largest inclination angle of 40 degree in our system, the  
12 system's axial resolution  $dz$  can be directly calculated as:

$$dz = \frac{dxy}{\tan\theta_{max}} = \frac{3.4\mu m}{\tan(40^\circ)} = 4 \mu m$$

13 The best way to confirm the theoretical estimation is to image two fluorescent beads with  
14 precisely controlled axial separations. But this is technically very challenging. Instead,  
15 we pursued an alternative method that is equivalent to imaging two beads simultaneously:  
16 (1) We first took a z stack of images of fluorescent beads, just like we do in measuring  
17 PSF.  
18 (2) In the post processing, we added two images taken at different z positions together to  
19 mimic the situation that the beads were present simultaneously at two different z  
20 positions.

1 Using this method, we could experimentally characterize the axial resolution at different  
2 z positions.

3

4 To compare the experimental result with the theoretical prediction, we used a single  
5 fluorescent bead with high SNR, as shown in Supplementary Figure 5a. We tested at  
6 different axial positions of  $z=-100\ \mu\text{m}$ ,  $z=0\ \mu\text{m}$  and  $z=100\ \mu\text{m}$ , as shown in  
7 Supplementary Figure 5b. The 3rd column shows the results by adding the two images in  
8 the column 1 & 2 together. The capability of resolving two beads in the 3rd column can  
9 be clearly seen by spatial frequency analysis, which is shown in the 4th column in  
10 Supplementary Fig 5b. The two line dips, which indicate the existence of two beads  
11 instead of one rod in the 4th column, are confirmations of the resolving capability. When  
12 the two beads were separated by  $5\ \mu\text{m}$ , micro-lens 1 and 2 could well resolve them in the  
13 range of  $-100\ \mu\text{m} \leq z \leq 0$  and  $0 \leq z \leq 100\ \mu\text{m}$ , respectively. The complementary  
14 information provided by the two groups of lens makes the whole system capable of  
15 maintaining high axial resolution of  $5\ \mu\text{m}$  across a  $200\ \mu\text{m}$  depth.

16

17 Although experimentally measured axial resolution was slightly lower than the  
18 theoretical prediction of  $4\ \mu\text{m}$ , the experimental data could describe more accurately the  
19 resolution change along different axial positions. To better estimate the system  
20 performance in practical conditions, we used a sample of densely packed  $0.5\ \mu\text{m}$  diameter  
21 fluorescent beads with moderate SNR, as shown in Supplementary Figure 6a.  $5\ \mu\text{m}$  axial  
22 resolution could still be preserved across a depth of  $100\ \mu\text{m}$ . The resolution decayed

1 gradually to  $\sim 10 \mu\text{m}$  at the edge of an imaging volume with  $400 \mu\text{m}$  axial coverage, as  
2 shown in Supplementary Figure 6b.

3

4 In vivo resolution characterization is challenging due to lack of bright and spot like  
5 features in living animals. Additionally, the achievable resolution depends on optical  
6 properties of biological tissues, which can be highly heterogeneous and difficult to infer.

7 The light scattering and aberration induced by biological tissue usually leads to degraded  
8 imaging performance [28, 42-44].

9

## 10 **XY tracking system**

11 To compensate lateral fish movement and to retain the entire fish head within the field of  
12 view of a high NA objective (25x, NA =1.05), a high speed camera captured fish motion  
13 (500 fps, Basler aca2000-340kmNIR) and we developed an FPGA-based RT system in  
14 LabVIEW that can rapidly identify the head position by processing the pixel stream data  
15 within the Cameralink card before the whole image was transferred to RAM. The error  
16 signal between the actual head position and the set point was then fed into PID to  
17 generate output signals and to control the movement of a high-speed motorized stage (PI  
18 M687 ultrasonic linear motor stage). In the case of large background noise, we  
19 alternatively performed conventional imaging processing in C/C++ (within 1 ms delay).  
20 The rate-limiting factor of our lateral tracking system was the response time of the stage  
21 ( $\sim 300 \text{ Hz}$ ).

22



## 1 **Autofocus system**

2 We applied the principle of LFM to determine the axial movement of larval zebrafish.  
3 The autofocus camera behind a one-dimensional microlens array captured triplet images  
4 of the fish from different perspectives (Supplementary Figure 8a). Z motion caused an  
5 extension or contraction between the centroids of the fish head in the left and right sub-  
6 images, an inter-fish distance (Supplementary Figure 8b) that can be accurately computed  
7 from image autocorrelation. The inter-fish distance, multiplied by a pre-factor, can be  
8 used to estimate the z position of the fish, for it varies linearly with axial movement  
9 (Supplementary Figure 8c). The error signal between the actual axial position of the fish  
10 head and the set point was then fed into PID to generate an output signal to drive a piezo-  
11 coupled fish container. The feedback control system was written in LabVIEW. The code  
12 was further accelerated by parallel processing and the closed loop delay is ~ 5 ms. The  
13 rate-limiting factor of the autofocus system was the settling time of the piezo scanner (PI  
14 P725KHDS, 400  $\mu\text{m}$  travelling distance), which was about 10 ms.

15

## 16 **Real-time Behavioral Analysis**

17 Two high-speed cameras acquired dark-field images at high and low magnification  
18 respectively, and customized machine vision software written in C/C++ with the aid of  
19 OpenCV library was dedicated to perform real-time behavioral analysis of freely  
20 swimming larval zebrafish. At high magnification, eye positions, their orientation and  
21 convergence angle were computed; at low magnification, the contour of the whole fish,  
22 the centerline, body curvature as well as bending angle of the tail were computed. The

1 high mag RT analysis was running at ~ 120 fps and the low mag RT analysis was running  
2 at ~ 180 fps.

3

#### 4 **Zebrafish sample preparation**

5 All larval zebrafish (huc:h2b-gcamp6f and huc:gcamp6s) were raised in embryo medium  
6 under 28.5 °C and 14/10 hours light/dark cycle. Zebrafish were fed with paramecium  
7 since 4 days post-fertilization (dpf). For restrained experiments, 4-6 dpf zebrafish were  
8 embedded in 1% low melting point agarose. For freely moving experiments, 7-11 dpf  
9 zebrafish with 10% Hank's solution were transferred in a customized chamber (20 mm in  
10 diameter, 0.8 mm in depth), and 10-20 paramecia were added before the chamber is  
11 covered by a coverslip. All animal handlings were approved by the Institute of  
12 Neuroscience, Chinese Academy of Sciences.

13

#### 14 **Neural activities analysis**

15 To extract visual stimuli correlated neural activities shown in Figure 1e & f, the time  
16 series of 3D volume stacks were first converted to one 3D volume stack of same size.  
17 Each voxel in the converted 3D volume stack represents the variance of voxel values over  
18 time. Then, the neuron candidates are extracted by identifying local maxima in the  
19 converted 3D volume stack. Since the size of single neuron can be determined  
20 empirically, the size of Region-Of-Interest (ROI) was set accordingly. Using fixed ROI  
21 size, the voxels around local maxima were selected to represent neurons spatially. In the  
22 end, the fluorescence intensity signals over each neuron's ROI were integrated and  
23 extracted as neural activities. To identify visual stimuli correlated neural activities, the

1 neural activities  $\Delta F/F_0$  were normalized to their maximum calcium response  $\Delta F_{max}/F_0$   
2 over time and sorted according to their onset time when  $\Delta F$  first reaches 20% of its  
3  $\Delta F_{max}$  (Figure 1e & f) after visual stimuli.

4

5

## 6 **References:**

- 7 1. Kerr, J.N.D. and W. Denk, *Imaging in vivo: watching the brain in action*. Nature  
8 Reviews Neuroscience, 2008. **9**(3): p. 195-205.
- 9 2. Dombeck, D.A., et al., *Imaging large-scale neural activity with cellular  
10 resolution in awake, mobile mice*. Neuron, 2007. **56**(1): p. 43-57.
- 11 3. Wyart, C., et al., *Optogenetic dissection of a behavioural module in the vertebrate  
12 spinal cord*. Nature, 2009. **461**(7262): p. 407-U105.
- 13 4. Boyden, E.S., et al., *Millisecond-timescale, genetically targeted optical control of  
14 neural activity*. Nature Neuroscience, 2005. **8**(9): p. 1263-1268.
- 15 5. Zhang, F., et al., *Multimodal fast optical interrogation of neural circuitry*. Nature,  
16 2007. **446**(7136): p. 633-U4.
- 17 6. Chen, T.W., et al., *Ultrasensitive fluorescent proteins for imaging neuronal  
18 activity*. Nature, 2013. **499**(7458): p. 295-+.
- 19 7. Tian, L., et al., *Imaging neural activity in worms, flies and mice with improved  
20 GCaMP calcium indicators*. Nature Methods, 2009. **6**(12): p. 875-U113.
- 21 8. Luo, L., E.M. Callaway, and K. Svoboda, *Genetic dissection of neural circuits*.  
22 Neuron, 2008. **57**(5): p. 634-660.
- 23 9. Friedrich, R.W., G.A. Jacobson, and P. Zhu, *Circuit neuroscience in zebrafish*.  
24 Curr Biol, 2010. **20**(8): p. R371-81.
- 25 10. Ahrens, M.B. and F. Engert, *Large-scale imaging in small brains*. Curr Opin  
26 Neurobiol, 2015. **32**: p. 78-86.
- 27 11. Ahrens, M.B., et al., *Brain-wide neuronal dynamics during motor adaptation in  
28 zebrafish*. Nature, 2012. **485**(7399): p. 471-7.
- 29 12. Ahrens, M.B., et al., *Whole-brain functional imaging at cellular resolution using  
30 light-sheet microscopy*. Nat Methods, 2013. **10**(5): p. 413-20.
- 31 13. Engert, F., *The big data problem: turning maps into knowledge*. Neuron, 2014.  
32 **83**(6): p. 1246-8.
- 33 14. Engert, F., *Fish in the matrix: motor learning in a virtual world*. Front Neural  
34 Circuits, 2012. **6**: p. 125.
- 35 15. Bianco, I.H., et al., *The tangential nucleus controls a gravito-inertial vestibulo-  
36 ocular reflex*. Curr Biol, 2012. **22**(14): p. 1285-95.
- 37 16. Bianco, I.H., A.R. Kampff, and F. Engert, *Prey capture behavior evoked by  
38 simple visual stimuli in larval zebrafish*. Front Syst Neurosci, 2011. **5**: p. 101.
- 39 17. Patterson, B.W., et al., *Visually guided gradation of prey capture movements in  
40 larval zebrafish*. J Exp Biol, 2013. **216**(Pt 16): p. 3071-83.

- 1 18. Trivedi, C.A. and J.H. Bollmann, *Visually driven chaining of elementary swim*  
2 *patterns into a goal-directed motor sequence: a virtual reality study of zebrafish*  
3 *prey capture*. Front Neural Circuits, 2013. **7**: p. 86.
- 4 19. Naumann, E.A., et al., *Monitoring neural activity with bioluminescence during*  
5 *natural behavior*. Nat Neurosci, 2010. **13**(4): p. 513-20.
- 6 20. Muto, A., et al., *Real-time visualization of neuronal activity during perception*.  
7 Curr Biol, 2013. **23**(4): p. 307-11.
- 8 21. Broxton, M., et al., *Wave optics theory and 3-D deconvolution for the light field*  
9 *microscope*. Opt Express, 2013. **21**(21): p. 25418-39.
- 10 22. Prevedel, R., et al., *Simultaneous whole-animal 3D imaging of neuronal activity*  
11 *using light-field microscopy*. Nat Methods, 2014. **11**(7): p. 727-30.
- 12 23. Pégard, N.C., et al., *Compressive light-field microscopy for 3D neural activity*  
13 *recording*. Optica, 2016. **3**(5): p. 517-524.
- 14 24. Severi, K.E., et al., *Neural control and modulation of swimming speed in the*  
15 *larval zebrafish*. Neuron, 2014. **83**(3): p. 692-707.
- 16 25. Adelson, E.H. and J.Y.A. Wang, *Single Lens Stereo with a Plenoptic Camera*.  
17 Ieee Transactions on Pattern Analysis and Machine Intelligence, 1992. **14**(2): p.  
18 99-106.
- 19 26. Abrahamsson, S., et al., *Fast multicolor 3D imaging using aberration-corrected*  
20 *multifocus microscopy*. Nat Meth, 2013. **10**(1): p. 60-63.
- 21 27. Perwass, C. and L. Wietzke. *Single lens 3D-camera with extended depth-of-field*.  
22 2012.
- 23 28. Ji, N., *Adaptive optical fluorescence microscopy*. Nat Meth, 2017. **14**(4): p. 374-  
24 380.
- 25 29. Semmelhack, J.L., et al., *A dedicated visual pathway for prey detection in larval*  
26 *zebrafish*. Elife, 2014. **3**.
- 27 30. Bianco, I.H. and F. Engert, *Visuomotor transformations underlying hunting*  
28 *behavior in zebrafish*. Curr Biol, 2015. **25**(7): p. 831-46.
- 29 31. Venkatachalam, V., et al., *Pan-neuronal imaging in roaming Caenorhabditis*  
30 *elegans*. Proc Natl Acad Sci U S A, 2016. **113**(8): p. E1082-8.
- 31 32. Nguyen, J.P., et al., *Whole-brain calcium imaging with cellular resolution in*  
32 *freely behaving Caenorhabditis elegans*. Proc Natl Acad Sci U S A, 2016. **113**(8):  
33 p. E1074-81.
- 34 33. Berg, H.C., *How to Track Bacteria*. Review of Scientific Instruments, 1971. **42**(6):  
35 p. 868-&.
- 36 34. Ng, R., et al., *Light Field Photography with a Hand-held Plenoptic Camera*.  
37 Stanford Tech Report 2005.
- 38 35. Levoy, M., et al., *Light field microscopy*. ACM Trans. on Graphics (Proc.  
39 SIGGRAPH), 2006. **25**: p. 924-934.
- 40 36. Niell, C.M. and M.P. Stryker, *Modulation of visual responses by behavioral state*  
41 *in mouse visual cortex*. Neuron, 2010. **65**(4): p. 472-9.
- 42 37. Maimon, G., A.D. Straw, and M.H. Dickinson, *Active flight increases the gain of*  
43 *visual motion processing in Drosophila*. Nat Neurosci, 2010. **13**(3): p. 393-9.
- 44 38. Chiappe, M.E., et al., *Walking modulates speed sensitivity in Drosophila motion*  
45 *vision*. Curr Biol, 2010. **20**(16): p. 1470-5.

- 1 39. Pearson, K.G., *Proprioceptive regulation of locomotion*. Current Opinion in  
2 Neurobiology, 1995. **5**(6): p. 786-791.
- 3 40. Bell, C.C., *An Efference Copy Which Is Modified by Reafferent Input*. Science,  
4 1981. **214**(4519): p. 450-453.
- 5 41. St-Pierre, F., et al., *High-fidelity optical reporting of neuronal electrical activity*  
6 *with an ultrafast fluorescent voltage sensor*. Nat Neurosci, 2014. **17**(6): p. 884-9.
- 7 42. Ji, N., D.E. Milkie, and E. Betzig, *Adaptive optics via pupil segmentation for*  
8 *high-resolution imaging in biological tissues*. Nat Meth, 2010. **7**(2): p. 141-147.
- 9 43. Wang, K., et al., *Rapid adaptive optical recovery of optimal resolution over large*  
10 *volumes*. Nat Meth, 2014. **11**(6): p. 625-628.
- 11 44. Wang, K., et al., *Direct wavefront sensing for high-resolution in vivo imaging in*  
12 *scattering tissue*. Nature Communications, 2015. **6**: p. 7276.
- 13

14

## 15 **Acknowledgements**

16 We thank Misha B. Ahrens for zebrafish lines. We thank Yong Jiang, Tongzhou Zhao,  
17 WenKai Han, Shenqi Fan and Kexin Qi for the assistance of building the 3D tracking  
18 system, the real time behavioral analysis and for performing larval zebrafish experiments.

19 We thank Dr. Jie He for his support on zebrafish handling and helpful discussions.

20

1 **Supplementary Videos:**

2 **Supplementary Video 1| Whole brain functional imaging of larval zebrafish under**  
3 **light stimulation**

4 Whole brain XLFM imaging of a 5 dpf agarose-embedded larval zebrafish expressing  
5 nucleus-localized GCamp6f. Light stimulation was introduced at time point  $t=0$ . Whole  
6 brain activities was recorded at 77 volumes/s.

7

8 **Supplementary Video 2| Whole brain functional imaging of larval zebrafish's**  
9 **spontaneous activities**

10 Whole brain XLFM imaging of a 5 dpf agarose-embedded larval zebrafish expressing  
11 nucleus-localized GCamp6f. Spontaneous neural activities were recorded at 0.6  
12 volumes/s.

13

14 **Supplementary Video 3| Whole brain functional imaging of larval zebrafish's**  
15 **spontaneous activities**

16 Whole brain XLFM imaging of a 5 dpf agarose-embedded larval zebrafish expressing  
17 cytoplasm-labeled GCamp6s. Spontaneous neural activities were recorded at 0.6  
18 volumes/s.

19

20 **Supplementary Video 4| Whole brain functional imaging of larval zebrafish under**  
21 **light stimulation**

22 Whole brain XLFM imaging of a 5 dpf agarose-embedded larval zebrafish expressing  
23 cytoplasm-labeled GCamp6s. Light stimulation was introduced at time point  $t=0$ . Whole

1 brain activities were recorded at 50 volumes/s.

2

3 **Supplementary Video 5| Tracking of larval zebrafish during prey capture behavior**  
4 **at low resolution**

5 Tracking and real time kinematic analysis of larval zebrafish during prey capture  
6 behavior at low resolution. Recorded at 190 frames per second.

7

8 **Supplementary Video 6| Tracking of larval zebrafish during prey capture behavior**  
9 **at high resolution**

10 Tracking and real time kinematic analysis of larval zebrafish during prey capture  
11 behavior at high resolution. Recorded at 160 frames per second.

12

13 **Supplementary Video 7| Whole brain functional imaging of a freely swimming**  
14 **larval zebrafish under light stimulation**

15 Whole brain XLFM imaging of a 7 dpf freely swimming larval zebrafish expressing  
16 cytoplasm-labeled GCamp6s. Light stimulation was introduced at time point  $t=0$ . Whole  
17 brain activities were recorded at 77 volumes/s and with flashed excitation laser of 0.3 ms  
18 exposure time.

19

20 **Supplementary Video 8| Whole brain functional imaging of a freely swimming**  
21 **larval zebrafish during prey capture behavior**

22 Whole brain XLFM imaging of an 11 dpf freely swimming larval zebrafish expressing  
23 cytoplasm-labeled GCamp6s. The entire process during which the larval zebrafish caught

1 and ate the paramecium was recorded.

2

3 **Supplementary Video 9| Whole brain functional imaging of a freely swimming**  
4 **larval zebrafish during prey capture behavior**

5 Whole brain XLFM imaging of a 7 dpf freely swimming larval zebrafish expressing  
6 nucleus-localized GCamp6f. The entire process during which the larval zebrafish caught  
7 and ate the paramecium was recorded.

8



1 **Supplementary Figures:**

2 **Supplementary Figure 1| Customized lenslet array**

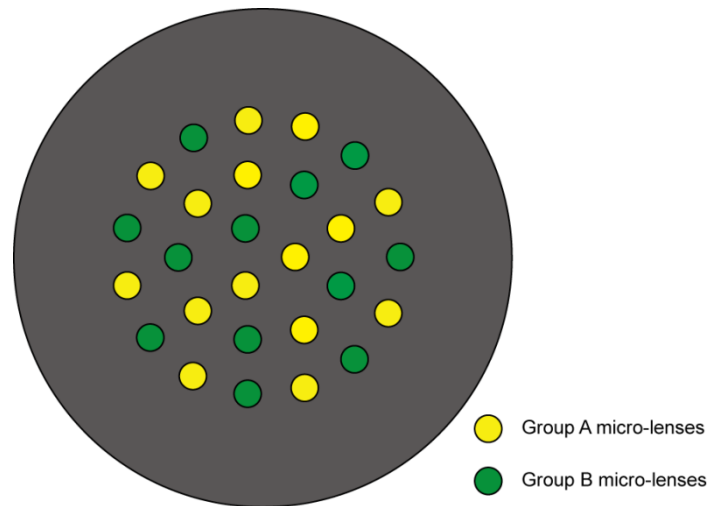

3

4 Customized lenslet array consist of 27 customized micro-lenses (1mm diameter, 26 mm  
5 focal length) embedded in an aluminum plate. Micro-lenses were divided into two groups  
6 (A or B), illustrated by yellow and green color respectively.

7

1 **Supplementary Figure 2| Experimentally measured PSF of the whole imaging**  
2 **system**

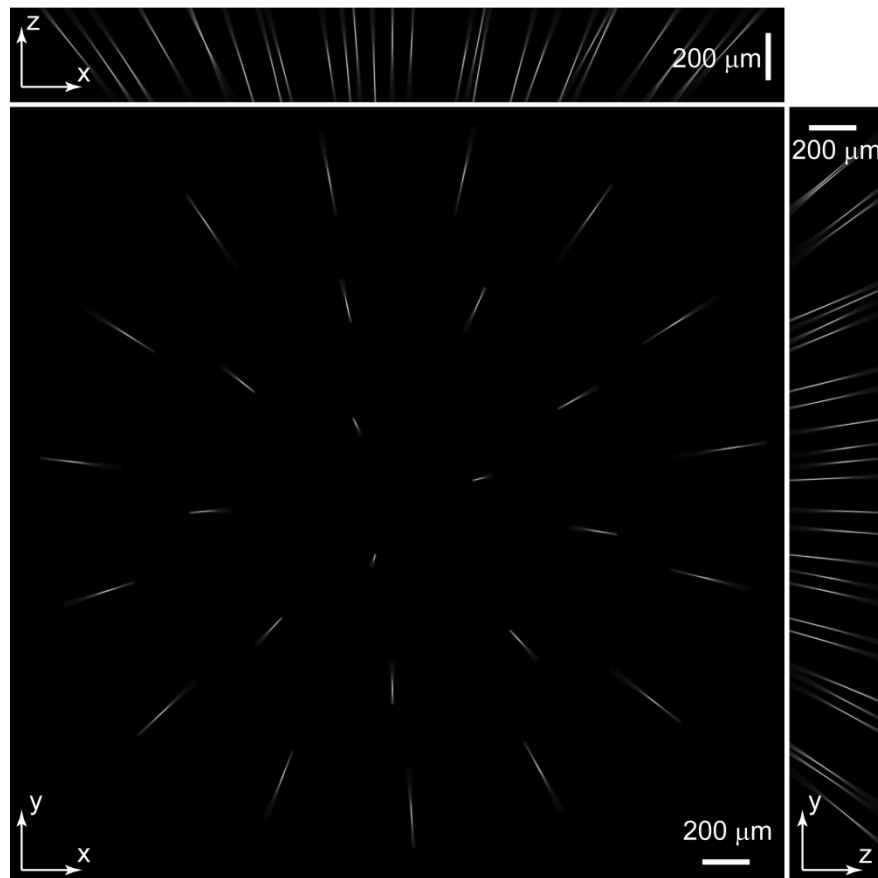

3  
4 Maximum Intensity Projections (MIPs) of the measured raw PSF stack. The stack has a  
5 size of 2048 pixels x 2048 pixels x 200 pixels with voxel size of 1.6  $\mu\text{m}$  x 1.6  $\mu\text{m}$  x 2  $\mu\text{m}$ .  
6

## 1 Supplementary Figure 3| PSF of the Group A micro-lenses: PSF\_A

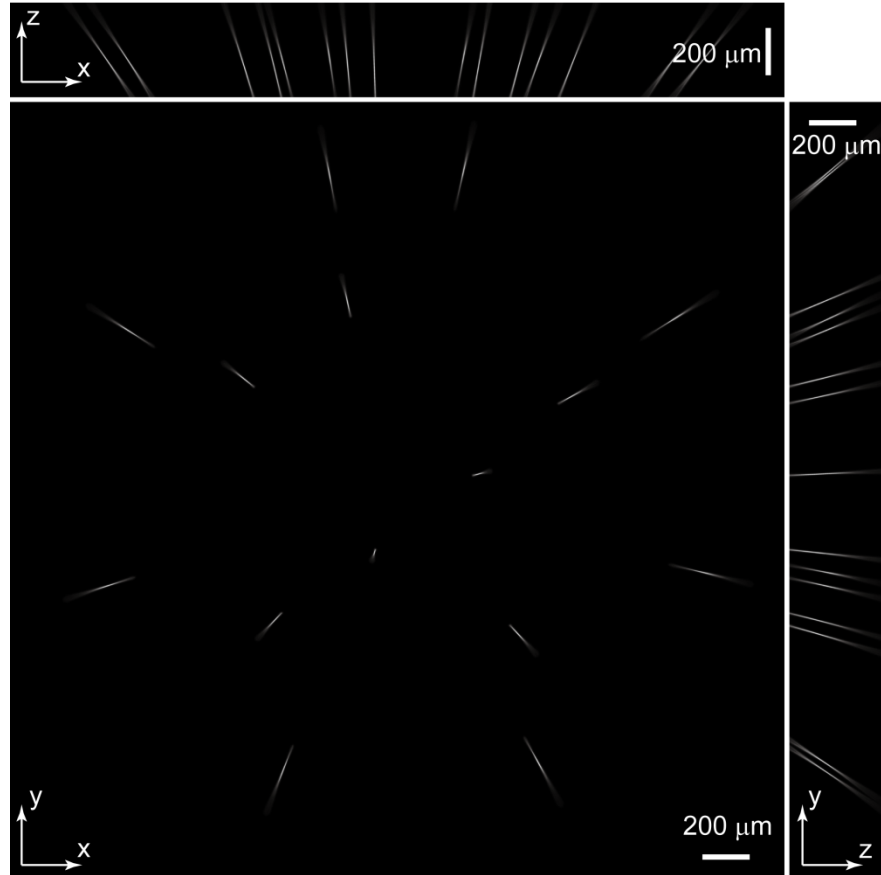

2

3 Maximum Intensity Projections (MIP) of PSF\_A. PSF\_A was extracted from  
4 experimentally measured PSF (Supplementary Figure 2) according to individual micro-  
5 lens' positions in group A.

6

## 1 Supplementary Figure 4| PSF of the Group B micro-lenses: PSF\_B

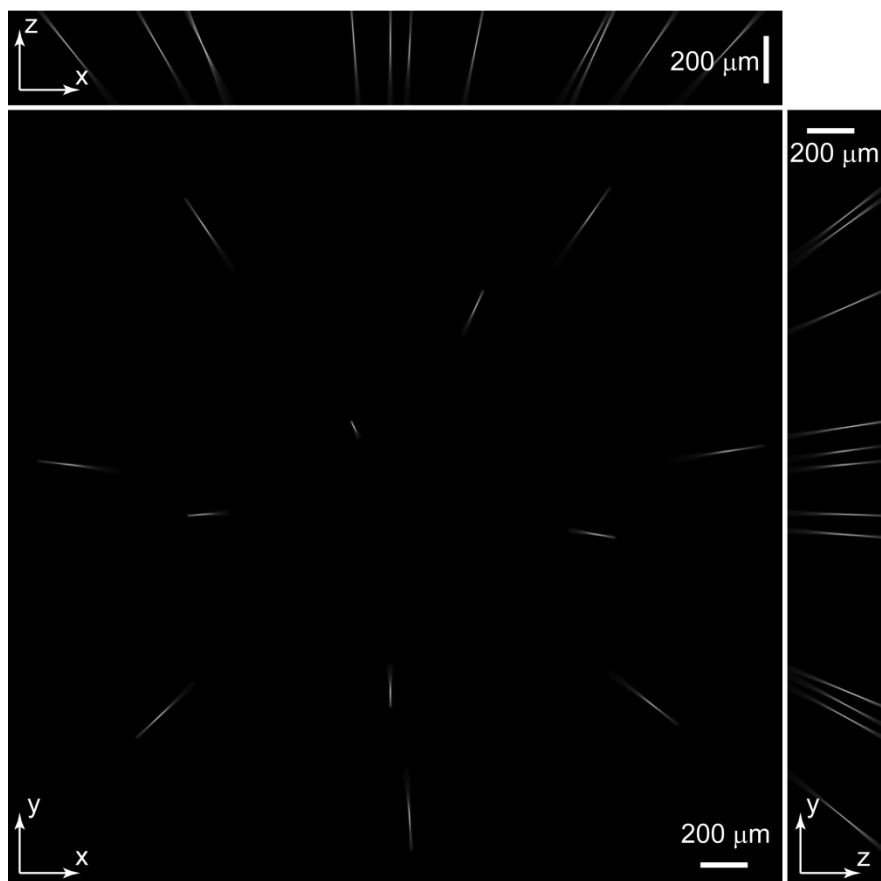

2

3 Maximum Intensity Projections (MIP) of PSF\_B. PSF\_B was extracted from  
4 experimentally measured PSF (Supplementary Figure 2) according to individual micro-  
5 lens' positions in group B.

6

## 1 Supplementary Figure 5|Characterization of axial resolution of XLFM at high SNR

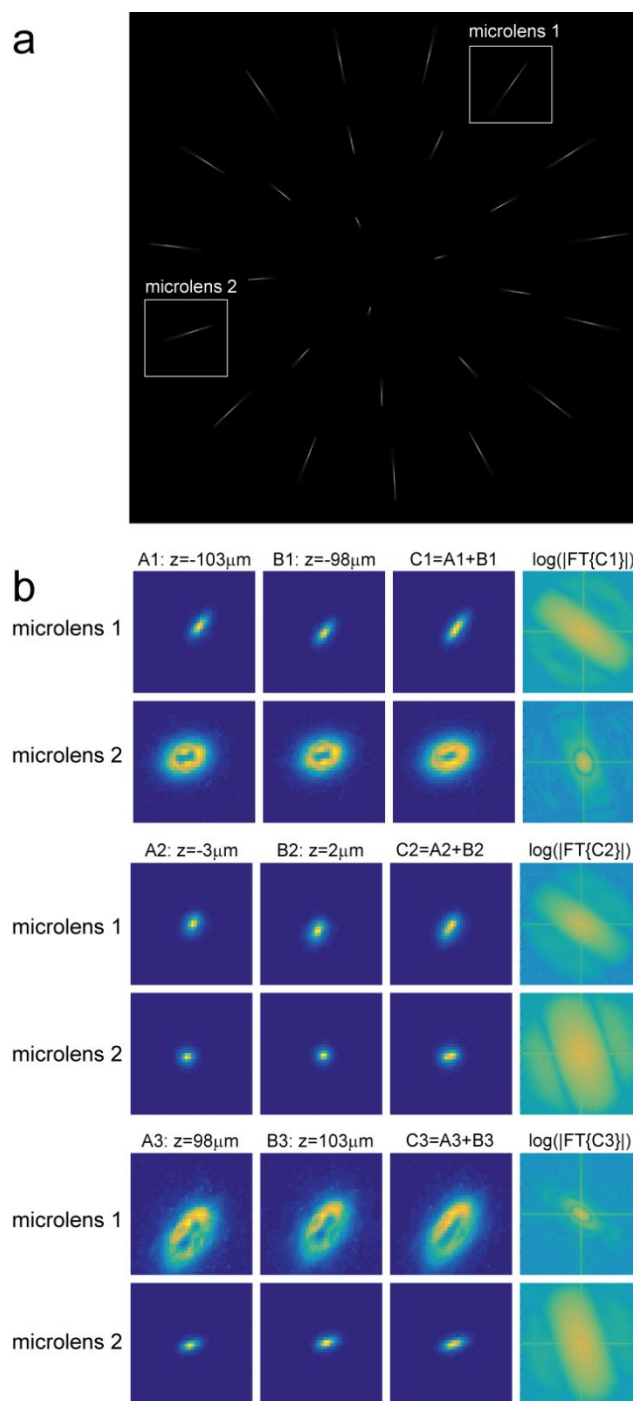

2

3 Characterization of axial resolution using a  $0.5\mu\text{m}$  diameter bright fluorescent particle (a)

4 Maximum intensity projection of an image stack consisting of particle's fluorescent

5 images captured at different  $z$  positions. (b) Analysis of images formed by micro-lens 1

1 and 2, indicated by sub-regions as shown in (a). The 1st and 2nd columns are the  
2 particle's fluorescent images captured at different z positions that are separated by 5 $\mu$ m.  
3 The 3rd column is the sum of column 1 and 2. The 4th column is the Fourier analysis of  
4 column 3 using function:  $f(x) = \log(|\mathcal{F}(x)|)$ , where  $\mathcal{F}(x)$  represents Fourier Transform.  
5

## 1 Supplementary Figure 6|Characterization of axial resolution of XLFM at low SNR

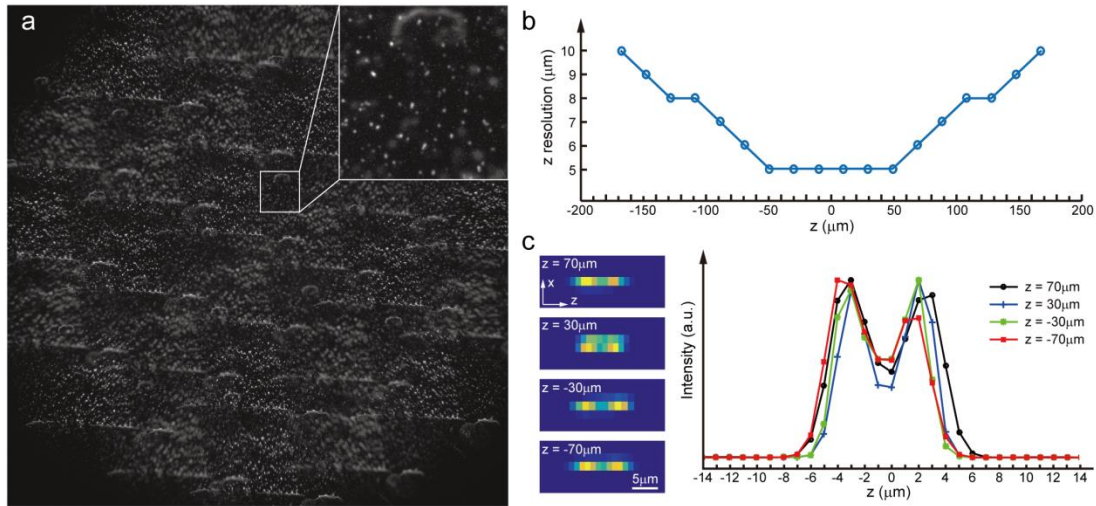

2

3 Characterization of axial resolution using densely packed fluorescent particles ( $0.5\mu\text{m}$  in

4 diameter) at low SNR. (a) Sample image from an image stack of fluorescent particles

5 captured at different z positions. (b) Axial resolution at different depth characterized by

6 finding the minimum separation of two particles in z, which can be well resolved using

7 the reconstruction algorithm (Supplementary Note 1). (c) Left, reconstructed examples of

8 X-Z projections of two particles located at different z positions ( $-70\mu\text{m}$ ,  $-30\mu\text{m}$ ,  $30\mu\text{m}$ ,

9  $70\mu\text{m}$ ) with different axial separations ( $6\mu\text{m}$ ,  $5\mu\text{m}$ ,  $5\mu\text{m}$ ,  $6\mu\text{m}$ ); right, extracted

10 intensity profiles of these examples.

11

1 **Supplementary Figure 7| Characterization of photo bleaching effect in fluorescence**  
2 **imaging by XLFM**

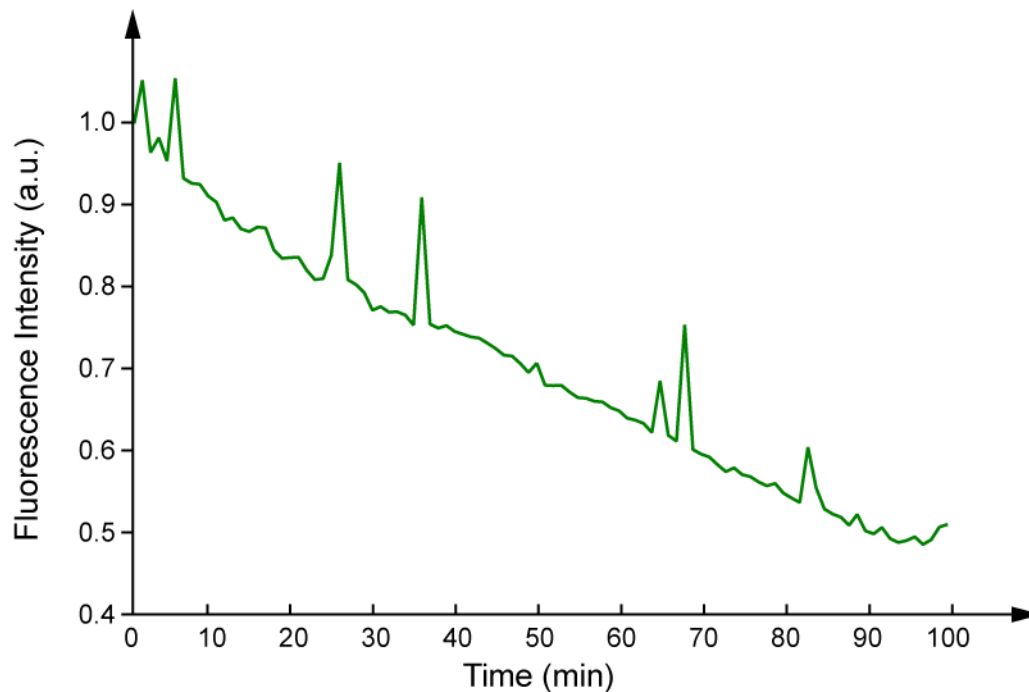

3

4 Photo-bleaching effect was characterized by total fluorescence intensity change of a 7dpf  
5 zebrafish larval with nucleus-localized GCamp6f. The fish was embedded in 1% agarose  
6 and was continuously exposed to  $2.5\text{mW}/\text{mm}^2$  fluorescence excitation laser (488nm)  
7 illumination. After ~100 minutes, corresponding to 300,000 volumes when volume rate is  
8 50 volumes/s, the fluorescence intensity dropped to half of that at the starting point. The  
9 random peaks appearing in the curve corresponded to spontaneous neural activities. The  
10 fish was alive and swam normally when it was relieved from agarose after imaging.

11



## 1 Supplementary Figure 8 | Characterization of the autofocus system

2

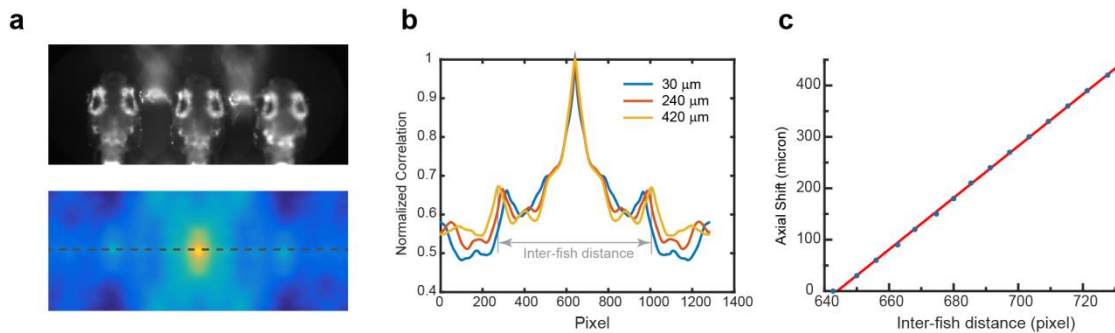

3

4 (a) Autofocus camera behind a one-dimensional lenslet array captured triplet images of

5 fish head (up). Its autocorrelation function was computed (bottom). (b) The central line

6 profile of the autocorrelation function was extracted and the inter-fish distance was

7 computed by finding the local maximums in the autocorrelation function. (c) The Axial

8 shift of fish head, calibrated by moving the piezo at constant interval, fit linearly (red line)

9 with the inter-fish distance.

10

1 **Supplementary Figure 9| Example of camera captured raw imaging data of larval**  
2 **zebrafish.**

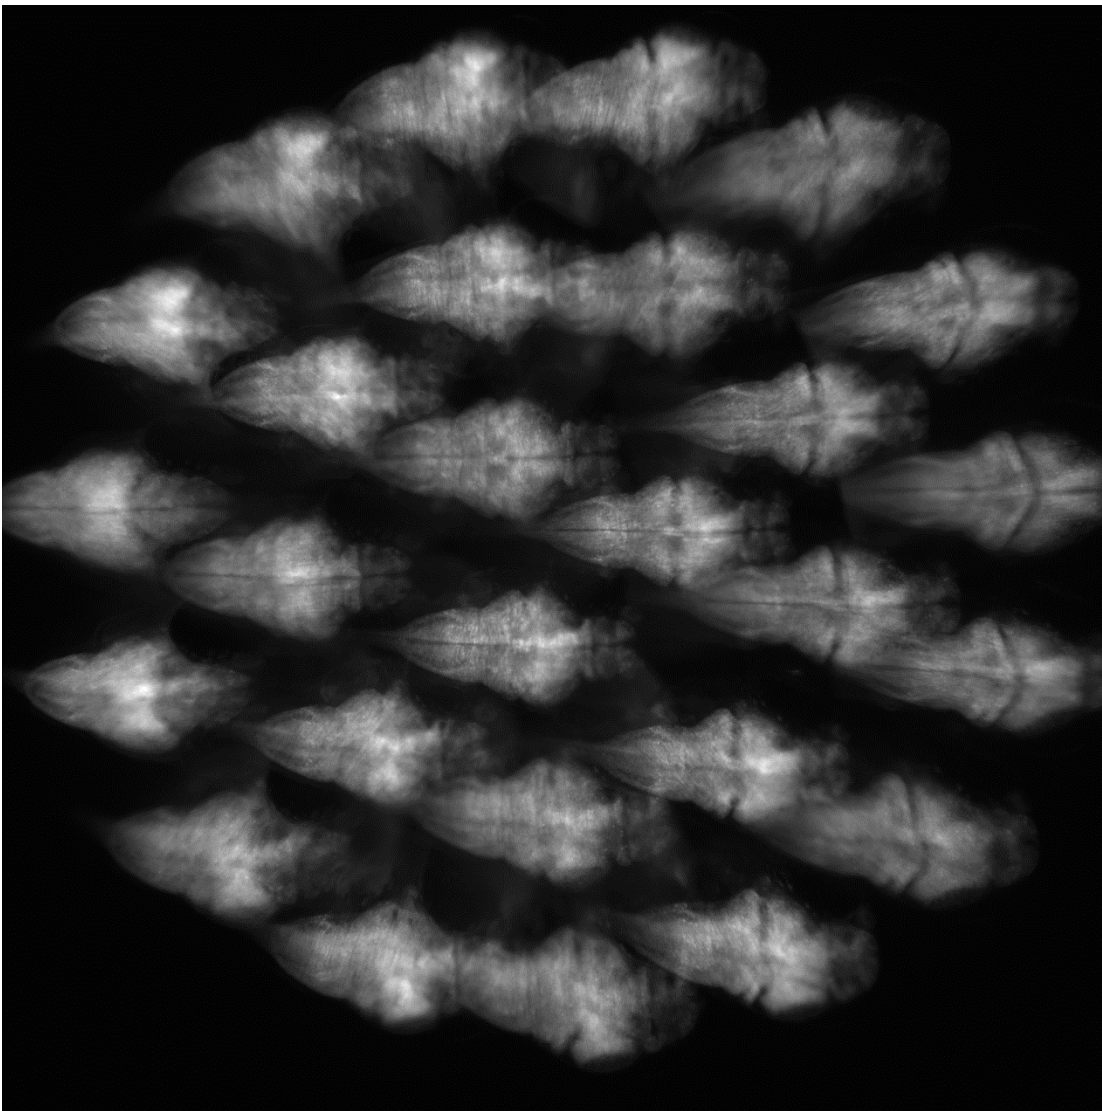

3  
4 Raw fluorescence imaging data consists of 27 sub-images of a larval zebrafish formed by  
5 27 micro-lenses. The overlaps between sub-images were allowed and the reconstruction  
6 algorithm can automatically resolve this problem without affecting imaging performance.  
7

## 1 Supplementary Table

### 2 Acquisition parameters for fluorescence imaging

|                       | Zebrafish lines | Age (dpf) | Volume rate (Hz) | Flash laser exposure time (ms) | Average laser illumination intensity (mW/mm <sup>2</sup> ) |
|-----------------------|-----------------|-----------|------------------|--------------------------------|------------------------------------------------------------|
| Figure 1              | huc:h2b-gcamp6f | 5         | 77               | 13                             | 2.5                                                        |
| Figure 3              | huc:gcamp6s     | 11        | 50               | 1                              | 2.8                                                        |
| Supplementary Video 1 | huc:h2b-gcamp6f | 5         | 77               | 13                             | 2.5                                                        |
| Supplementary Video 2 | huc:h2b-gcamp6f | 5         | 0.6              | 300                            | 0.5                                                        |
| Supplementary Video 3 | huc:gcamp6s     | 5         | 0.6              | 100                            | 0.37                                                       |
| Supplementary Video 4 | huc:gcamp6s     | 6         | 50               | 20                             | 0.37                                                       |
| Supplementary Video 7 | huc:gcamp6s     | 7         | 77               | 0.3                            | 1.3                                                        |
| Supplementary Video 8 | huc:gcamp6s     | 11        | 50               | 1                              | 2.8                                                        |
| Supplementary Video 9 | huc:h2b-gcamp6f | 7         | 77               | 0.2                            | 0.9                                                        |

3

1
